# Supplementary material
Source: PubMed Central journal article supplement (PMC3888280)
Supplement: supp_djt204_jnci_JNCI_12_1937_s02.pdf [file supp_djt204_jnci_JNCI_12_1937_s02.pdf]

**Supplementary Table 1:** Characteristics of 122 breast cancers with matched FFPET, FFPELN, and WBC.

|                                     |                                | <b><u>N=</u></b> | <b><u>%</u></b> |
|-------------------------------------|--------------------------------|------------------|-----------------|
| <b>Tumor Grade</b>                  | 1                              | 23               | 19.0%           |
|                                     | 2                              | 62               | 51.2%           |
|                                     | 3                              | 35               | 28.9%           |
|                                     | Unknown                        | 2                | 1.6%            |
| <b>Histology</b>                    | Ductal                         | 81               | 67.5%           |
|                                     | Lobular                        | 17               | 14.2%           |
|                                     | Tubular                        | 1                | 0.8%            |
|                                     | Ductal with lobular features   | 7                | 5.8%            |
|                                     | Ductal with tubular features   | 1                | 0.8%            |
|                                     | Ductal with medullary features | 2                | 1.7%            |
|                                     | Ductal, apocrine type          | 2                | 1.7%            |
|                                     | Mucinous                       | 1                | 0.8%            |
|                                     | Mixed                          | 5                | 4.2%            |
|                                     | Other                          | 3                | 2.5%            |
|                                     | Unknown                        | 2                | 1.6%            |
| <b>ER status</b>                    | Positive                       | 101              | 82.8%           |
|                                     | Negative                       | 21               | 17.2%           |
|                                     | Unknown                        | 0                | 0.0%            |
| <b>PR status</b>                    | Positive                       | 88               | 72.1%           |
|                                     | Negative                       | 34               | 27.9%           |
|                                     | unknown                        | 0                | 0.0%            |
| <b>HER2 status</b>                  | Positive                       | 22               | 18.0%           |
|                                     | Negative                       | 100              | 82.0%           |
|                                     | Unknown                        | 0                | 0.0%            |
| <b>Neoadjuvant<br/>Chemotherapy</b> | Yes                            | 18               | 14.8%           |
|                                     | No                             | 104              | 85.2%           |

**Supplementary Table 2:** *CYP2D6* allelic variants, genotype frequencies and P-value for Hardy-Weinberg Equilibrium (HWE) test for 122 breast cancer patients' DNA samples obtained from WBC.

| <i>CYP2D6</i> allele | Variant alleles, N (%) | Genotype, N (%) |              |            | HWE      |
|----------------------|------------------------|-----------------|--------------|------------|----------|
|                      |                        | Homozygous      | Heterozygous | Wild type  | P-value* |
| <i>CYP2D6</i> *2     | 72 (29.5)              | 11 (9.0)        | 50 (41.0)    | 61 (50.0)  | 0.83     |
| <i>CYP2D6</i> *3     | 2 (0.8)                | 0               | 2 (1.6)      | 120 (98.4) | 1.00     |
| <i>CYP2D6</i> *4     | 51 (20.9)              | 4 (3.3)         | 43 (35.2)    | 75 (61.5)  | 0.59     |
| <i>CYP2D6</i> *6     | 5 (2.0)                | 0               | 5 (4.1)      | 117 (95.9) | 1.00     |
| <i>CYP2D6</i> *10    | 6 (2.5)                | 0               | 6 (4.9)      | 116 (95.1) | 1.00     |
| <i>CYP2D6</i> *41    | 18 (7.4)               | 1 (0.8)         | 16 (13.1)    | 105 (86.1) | 0.49     |

\*P-value obtained from exact test for deviation from Hardy-Weinberg Equilibrium.

**Supplementary Table 3:** CYP2D6 Genotypes from 122 breast cancer patients' matched DNA samples obtained from WBC, FFPE tumor (FFPET), and FFPE lymph node (FFPELN)

| Sample # | WBC      |       |    |                | FFPET    |       | FFPELN   |       |
|----------|----------|-------|----|----------------|----------|-------|----------|-------|
|          | Genotype | Score | CN | Score with CNV | Genotype | Score | Genotype | Score |
| 9        | *4/*2    | 1     | 2  | 1              | ND       | ND    | *4/*2    | 1     |
| 39       | *1/*1    | 2     | 2  | 2              | *2/*1    | 2     | *1/*1    | 2     |
| 71       | *2/*1    | 2     | 2  | 2              | *1/*1    | 2     | *2/*1    | 2     |
| 92       | *2/*1    | 2     | 2  | 2              | *1/*1    | 2     | *2/*1    | 2     |
| 113      | *1/*1    | 2     | 2  | 2              | *2/*1    | 2     | *1/*1    | 2     |
| 124      | *4/*2    | 1     | 2  | 1              | *4/*10   | 0.5   | *4/*2    | 1     |
| 130      | *2/*2    | 2     | 2  | 2              | *2/*10   | 1.5   | *2/*2    | 2     |
| 142      | *4/*2    | 1     | 2  | 1              | *4/*1    | 1     | *4/*2    | 1     |
| 42       | *4/*1    | 1     | 2  | 1              | *4/*1    | 1     | ND       | ND    |
| 62       | *1/*1    | 2     | 2  | 2              | *1/*1    | 2     | ND       | ND    |
| 99       | *2/*1    | 2     | 2  | 2              | *2/*1    | 2     | ND       | ND    |
| 100      | *4/*1    | 1     | 2  | 1              | *4/*1    | 1     | ND       | ND    |
| 123      | *2/*1    | 2     | 2  | 2              | *2/*1    | 2     | ND       | ND    |
| 136*     | *2/*41   | 1.5   | 2  | 1.5            | *2/*41   | 1.5   | ND       | ND    |
| 28       | *4/*4    | 0     | 2  | 0              | *4/*4    | 0     | *10/*1   | 1.5   |
| 74       | *4/*2    | 1     | 2  | 1              | *4/*2    | 1     | *4/*10   | 0.5   |
| 26       | *2/*2    | 2     | 1  | 1              | *2/*2    | 2     | *2/*2    | 2     |
| 30       | *1/*1    | 2     | 1  | 1              | *1/*1    | 2     | *1/*1    | 2     |
| 59       | *2/*2    | 2     | 1  | 1              | *2/*2    | 2     | *2/*2    | 2     |
| 89       | *1/*1    | 2     | 1  | 1              | *1/*1    | 2     | *1/*1    | 2     |
| 90       | *1/*1    | 2     | 1  | 1              | *1/*1    | 2     | *1/*1    | 2     |
| 93       | *1/*1    | 2     | 1  | 1              | *1/*1    | 2     | *1/*1    | 2     |
| 110      | *41/*41  | 1     | 1  | 0.5            | *41/*41  | 1     | *41/*41  | 1     |
| 117      | *2/*2    | 2     | 1  | 1              | *2/*2    | 2     | *2/*2    | 2     |
| 122      | *2/*2    | 2     | 1  | 1              | *2/*2    | 2     | *2/*2    | 2     |
| 1        | *4/*4    | 0     | >2 | 0              | *4/*4    | 0     | *4/*4    | 0     |
| 77       | *2/*2    | 2     | >2 | 3              | *2/*2    | 2     | *2/*2    | 2     |
| 84       | *41/*1   | 1.5   | >2 | >1.5           | *41/*1   | 1.5   | *41/*1   | 1.5   |
| 112      | *2/*2    | 2     | >2 | 3              | *2/*2    | 2     | *2/*2    | 2     |
| 118      | *4/*1    | 1     | >2 | ≥1             | *4/*1    | 1     | *4/*1    | 1     |
| 131      | *2/*1    | 2     | >2 | 3              | *2/*1    | 2     | *2/*1    | 2     |
| 2        | *4/*2    | 1     | 2  | 1              | *4/*2    | 1     | *4/*2    | 1     |
| 3        | *4/*1    | 1     | 2  | 1              | *4/*1    | 1     | *4/*1    | 1     |
| 4        | *4/*41   | 0.5   | 2  | 0.5            | *4/*41   | 0.5   | *4/*41   | 0.5   |
| 5        | *4/*2    | 1     | 2  | 1              | *4/*2    | 1     | *4/*2    | 1     |
| 6        | *6/*1    | 1     | 2  | 1              | *6/*1    | 1     | *6/*1    | 1     |

|    |          |     |   |     |          |     |          |     |
|----|----------|-----|---|-----|----------|-----|----------|-----|
| 7  | *4 / *10 | 0.5 | 2 | 0.5 | *4 / *10 | 0.5 | *4 / *10 | 0.5 |
| 8  | *4 / *1  | 1   | 2 | 1   | *4 / *1  | 1   | *4 / *1  | 1   |
| 10 | *4 / *1  | 1   | 2 | 1   | *4 / *1  | 1   | *4 / *1  | 1   |
| 11 | *2 / *1  | 2   | 2 | 2   | *2 / *1  | 2   | *2 / *1  | 2   |
| 13 | *10 / *1 | 1.5 | 2 | 1.5 | *10 / *1 | 1.5 | *10 / *1 | 1.5 |
| 16 | *4 / *1  | 1   | 2 | 1   | *4 / *1  | 1   | *4 / *1  | 1   |
| 18 | *4 / *1  | 1   | 2 | 1   | *4 / *1  | 1   | *4 / *1  | 1   |
| 21 | *4 / *41 | 0.5 | 2 | 0.5 | *4 / *41 | 0.5 | *4 / *41 | 0.5 |
| 22 | *4 / *1  | 1   | 2 | 1   | *4 / *1  | 1   | *4 / *1  | 1   |
| 23 | *2 / *1  | 2   | 2 | 2   | *2 / *1  | 2   | *2 / *1  | 2   |
| 24 | *2 / *1  | 2   | 2 | 2   | *2 / *1  | 2   | *2 / *1  | 2   |
| 25 | *1 / *1  | 2   | 2 | 2   | *1 / *1  | 2   | *1 / *1  | 2   |
| 31 | *2 / *10 | 1.5 | 2 | 1.5 | *2 / *10 | 1.5 | *2 / *10 | 1.5 |
| 32 | *2 / *1  | 2   | 2 | 2   | *2 / *1  | 2   | *2 / *1  | 2   |
| 33 | *41 / *1 | 1.5 | 2 | 1.5 | *41 / *1 | 1.5 | *41 / *1 | 1.5 |
| 34 | *2 / *2  | 2   | 2 | 2   | *2 / *2  | 2   | *2 / *2  | 2   |
| 36 | *2 / *2  | 2   | 2 | 2   | *2 / *2  | 2   | *2 / *2  | 2   |
| 37 | *4 / *2  | 1   | 2 | 1   | *4 / *2  | 1   | *4 / *2  | 1   |
| 38 | *2 / *1  | 2   | 2 | 2   | *2 / *1  | 2   | *2 / *1  | 2   |
| 41 | *4 / *10 | 0.5 | 2 | 0.5 | *4 / *10 | 0.5 | *4 / *10 | 0.5 |
| 43 | *4 / *1  | 1   | 2 | 1   | *4 / *1  | 1   | *4 / *1  | 1   |
| 44 | *3 / *41 | 0.5 | 2 | 0.5 | *3 / *41 | 0.5 | *3 / *41 | 0.5 |
| 48 | *2 / *41 | 1.5 | 2 | 1.5 | *2 / *41 | 1.5 | *2 / *41 | 1.5 |
| 49 | *41 / *1 | 1.5 | 2 | 1.5 | *41 / *1 | 1.5 | *41 / *1 | 1.5 |
| 50 | *1 / *1  | 2   | 2 | 2   | *1 / *1  | 2   | *1 / *1  | 2   |
| 52 | *2 / *1  | 2   | 2 | 2   | *2 / *1  | 2   | *2 / *1  | 2   |
| 53 | *41 / *1 | 1.5 | 2 | 1.5 | *41 / *1 | 1.5 | *41 / *1 | 1.5 |
| 56 | *2 / *6  | 1   | 2 | 1   | *2 / *6  | 1   | *2 / *6  | 1   |
| 63 | *2 / 10  | 1.5 | 2 | 1.5 | *2 / 10  | 1.5 | *2 / 10  | 1.5 |
| 64 | *2 / *1  | 2   | 2 | 2   | *2 / *1  | 2   | *2 / *1  | 2   |
| 65 | *4 / *2  | 1   | 2 | 1   | *4 / *2  | 1   | *4 / *2  | 1   |
| 67 | *4 / *2  | 1   | 2 | 1   | *4 / *2  | 1   | *4 / *2  | 1   |
| 68 | *4 / *4  | 0   | 2 | 0   | *4 / *4  | 0   | *4 / *4  | 0   |
| 69 | *2 / *1  | 2   | 2 | 2   | *2 / *1  | 2   | *2 / *1  | 2   |
| 70 | *4 / *2  | 1   | 2 | 1   | *4 / *2  | 1   | *4 / *2  | 1   |
| 72 | *4 / *2  | 1   | 2 | 1   | *4 / *2  | 1   | *4 / *2  | 1   |
| 75 | *4 / *1  | 1   | 2 | 1   | *4 / *1  | 1   | *4 / *1  | 1   |
| 76 | *41 / *1 | 1.5 | 2 | 1.5 | *41 / *1 | 1.5 | *41 / *1 | 1.5 |
| 78 | *2 / *1  | 2   | 2 | 2   | *2 / *1  | 2   | *2 / *1  | 2   |
| 80 | *2 / *6  | 1   | 2 | 1   | *2 / *6  | 1   | *2 / *6  | 1   |
| 81 | *4 / *41 | 0.5 | 2 | 0.5 | *4 / *41 | 0.5 | *4 / *41 | 0.5 |

|     |        |     |   |     |        |     |        |     |
|-----|--------|-----|---|-----|--------|-----|--------|-----|
| 82  | *4/*1  | 1   | 2 | 1   | *4/*1  | 1   | *4/*1  | 1   |
| 83  | *4/*1  | 1   | 2 | 1   | *4/*1  | 1   | *4/*1  | 1   |
| 85  | *2/*1  | 2   | 2 | 2   | *2/*1  | 2   | *2/*1  | 2   |
| 87  | *1/*1  | 2   | 2 | 2   | *1/*1  | 2   | *1/*1  | 2   |
| 88  | *4/*2  | 1   | 2 | 1   | *4/*2  | 1   | *4/*2  | 1   |
| 91  | *4/*2  | 1   | 2 | 1   | *4/*2  | 1   | *4/*2  | 1   |
| 94  | *4/*41 | 0.5 | 2 | 0.5 | *4/*41 | 0.5 | *4/*41 | 0.5 |
| 95  | *4/*1  | 1   | 2 | 1   | *4/*1  | 1   | *4/*1  | 1   |
| 96  | *2/*6  | 1   | 2 | 1   | *2/*6  | 1   | *2/*6  | 1   |
| 98  | *4/*2  | 1   | 2 | 1   | *4/*2  | 1   | *4/*2  | 1   |
| 101 | *2/*2  | 2   | 2 | 2   | *2/*2  | 2   | *2/*2  | 2   |
| 102 | *4/*1  | 1   | 2 | 1   | *4/*1  | 1   | *4/*1  | 1   |
| 103 | *4/*2  | 1   | 2 | 1   | *4/*2  | 1   | *4/*2  | 1   |
| 104 | *1/*1  | 2   | 2 | 2   | *1/*1  | 2   | *1/*1  | 2   |
| 105 | *4/*1  | 1   | 2 | 1   | *4/*1  | 1   | *4/*1  | 1   |
| 106 | *10/*1 | 1.5 | 2 | 1.5 | *10/*1 | 1.5 | *10/*1 | 1.5 |
| 107 | *6/*1  | 1   | 2 | 1   | *6/*1  | 1   | *6/*1  | 1   |
| 108 | *1/*1  | 2   | 2 | 2   | *1/*1  | 2   | *1/*1  | 2   |
| 109 | *4/*2  | 1   | 2 | 1   | *4/*2  | 1   | *4/*2  | 1   |
| 111 | *2/*1  | 2   | 2 | 2   | *2/*1  | 2   | *2/*1  | 2   |
| 114 | *4/*2  | 1   | 2 | 1   | *4/*2  | 1   | *4/*2  | 1   |
| 115 | *2/*1  | 2   | 2 | 2   | *2/*1  | 2   | *2/*1  | 2   |
| 116 | *4/*1  | 1   | 2 | 1   | *4/*1  | 1   | *4/*1  | 1   |
| 119 | *41/*1 | 1.5 | 2 | 1.5 | *41/*1 | 1.5 | *41/*1 | 1.5 |
| 120 | *2/*41 | 1.5 | 2 | 1.5 | *2/*41 | 1.5 | *2/*41 | 1.5 |
| 121 | *4/*2  | 1   | 2 | 1   | *4/*2  | 1   | *4/*2  | 1   |
| 125 | *1/*1  | 2   | 2 | 2   | *1/*1  | 2   | *1/*1  | 2   |
| 126 | *41/*1 | 1.5 | 2 | 1.5 | *41/*1 | 1.5 | *41/*1 | 1.5 |
| 127 | *2/*1  | 2   | 2 | 2   | *2/*1  | 2   | *2/*1  | 2   |
| 128 | *4/*4  | 0   | 2 | 0   | *4/*4  | 0   | *4/*4  | 0   |
| 129 | *4/*1  | 1   | 2 | 1   | *4/*1  | 1   | *4/*1  | 1   |
| 132 | *1/*1  | 2   | 2 | 2   | *1/*1  | 2   | *1/*1  | 2   |
| 134 | *41/*1 | 1.5 | 2 | 1.5 | *41/*1 | 1.5 | *41/*1 | 1.5 |
| 135 | *2/*1  | 2   | 2 | 2   | *2/*1  | 2   | *2/*1  | 2   |
| 137 | *1/*1  | 2   | 2 | 2   | *1/*1  | 2   | *1/*1  | 2   |
| 138 | *3/*1  | 1   | 2 | 1   | *3/*1  | 1   | *3/*1  | 1   |
| 139 | *2/*1  | 2   | 2 | 2   | *2/*1  | 2   | *2/*1  | 2   |
| 141 | *2/*1  | 2   | 2 | 2   | *2/*1  | 2   | *2/*1  | 2   |
| 143 | *1/*1  | 2   | 2 | 2   | *1/*1  | 2   | *1/*1  | 2   |
| 144 | *1/*1  | 2   | 2 | 2   | *1/*1  | 2   | *1/*1  | 2   |
| 145 | *4/*2  | 1   | 2 | 1   | *4/*2  | 1   | *4/*2  | 1   |

|     |         |   |   |   |         |   |         |   |
|-----|---------|---|---|---|---------|---|---------|---|
| 146 | *2 / *1 | 2 | 2 | 2 | *2 / *1 | 2 | *2 / *1 | 2 |
| 147 | *2 / *1 | 2 | 2 | 2 | *2 / *1 | 2 | *2 / *1 | 2 |
| 148 | *1 / *1 | 2 | 2 | 2 | *1 / *1 | 2 | *1 / *1 | 2 |
| 149 | *2 / *2 | 2 | 2 | 2 | *2 / *2 | 2 | *2 / *2 | 2 |

ND - not determined; \*sample #136 FFPELN genotype was not determined for unknown reason and is included in analyses as not concordant; the others were not determined because of low DNA quality/concentration.
